# Supplementary material for: Oxidative Deamination of Serum Albumins by (-)-Epigallocatechin-3-O-Gallate: A Potential Mechanism for the Formation of Innate Antigens by Antioxidants
Source: PubMed Central journal article supplement (PMC4821561; doi:10.1371/journal.pone.0153002), 2016-04-05
Supplement: pone.0153002.s009.pdf [file pone.0153002.s009.pdf]

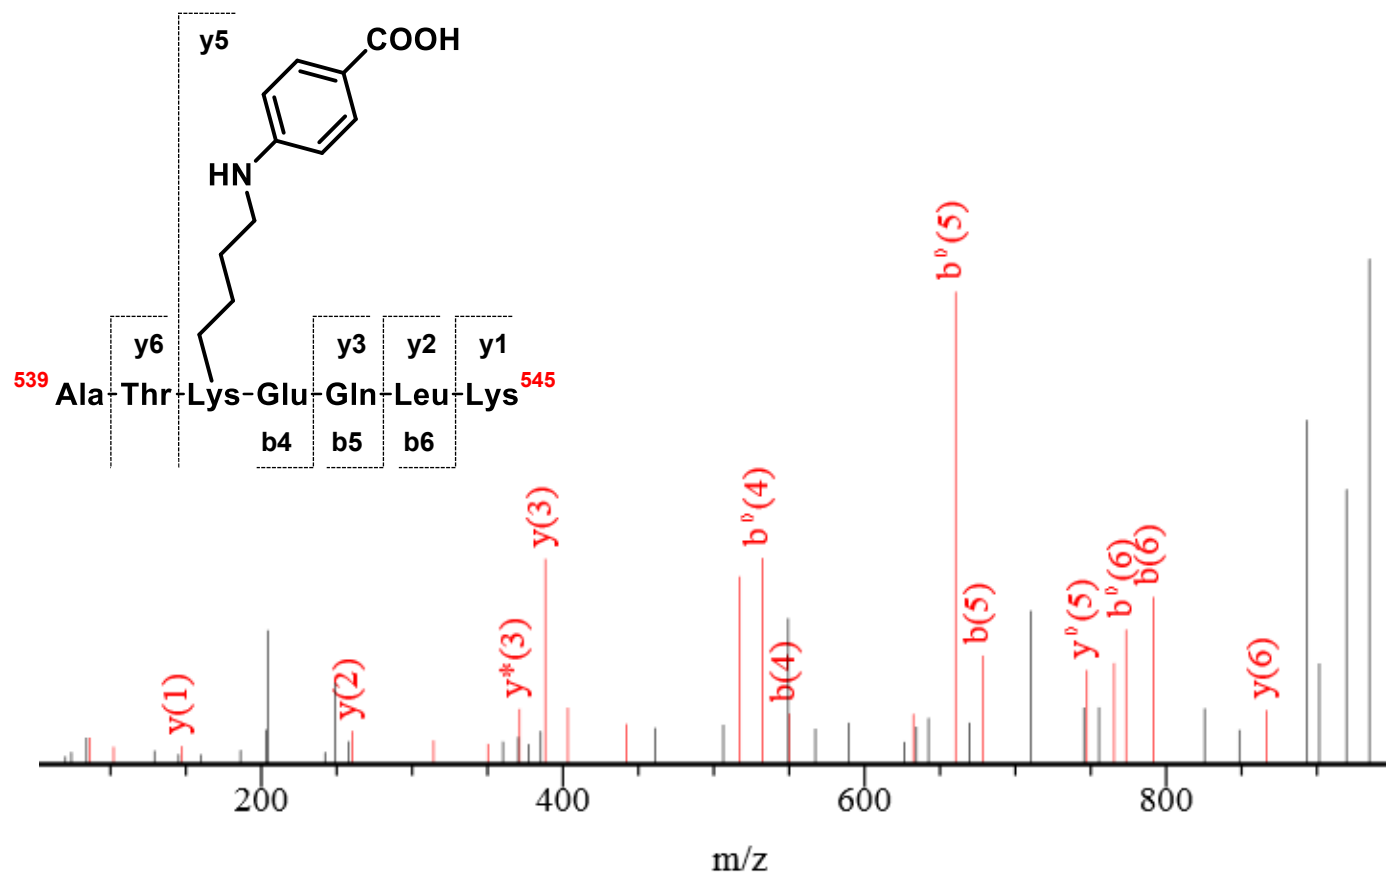

Fig. S9. Nanoelectrospray MS/MS spectrum of the ABA-AAS-containing HSA peptide.
