# Supplementary material for: Oxidative Deamination of Serum Albumins by (-)-Epigallocatechin-3-O-Gallate: A Potential Mechanism for the Formation of Innate Antigens by Antioxidants
Source: PubMed Central journal article supplement (PMC4821561; doi:10.1371/journal.pone.0153002), 2016-04-05
Supplement: pone.0153002.s011.pdf [file pone.0153002.s011.pdf]

**Table S1. Peptides identified by nano-LC-ESI-MS/MS from the EGCG-treated HSA.**

| Start | End | Observed  | Mr (expt) | Mr (calc) | Delta (Da) | Missed cleavage | Score | Peptide                                 |
|-------|-----|-----------|-----------|-----------|------------|-----------------|-------|-----------------------------------------|
| 191   | 197 | 867.3614  | 866.3541  | 866.4246  | -0.0705    | 1               | 26    | K.ASSA <b>K</b> QR.L + Lys>ABA-AAS (K)  |
| 198   | 205 | 1010.4346 | 1009.4273 | 1009.5266 | -0.0993    | 1               | 23    | R.L <b>K</b> CASLQK.F + Lys>ABA-AAS (K) |
| 429   | 436 | 922.4003  | 921.3931  | 921.492   | -0.0989    | 1               | 44    | R.NLG <b>K</b> VGSK.C + Lys>ABA-AAS (K) |
| 440   | 445 | 857.3583  | 856.351   | 856.4191  | -0.0681    | 1               | 34    | K.HPEA <b>K</b> R.M + Lys>ABA-AAS (K)   |
| 539   | 545 | 937.4102  | 936.4029  | 936.4916  | -0.0887    | 1               | 41    | K.AT <b>K</b> EQLK.A + Lys>ABA-AAS (K)  |
